# Supplementary material for: Dominant contribution of oxygenated organic aerosol to haze particles from real-time observation in Singapore during an Indonesian wildfire event in 2015
Source: Copernicus journal article supplement (doi:10.5194/acp-18-16481-2018), 2018-11-21
Supplement: Supplementary file 1 [file acp-18-16481-2018-supplement.pdf]

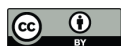

*Supplement of*

**Dominant contribution of oxygenated organic aerosol to haze particles from real-time observation in Singapore during an Indonesian wildfire event in 2015**

**Sri Hapsari Budisulistiorini et al.**

*Correspondence to:* Sri Hapsari Budisulistiorini ([sri.hb@ntu.edu.sg](mailto:sri.hb@ntu.edu.sg)) and Mikinori Kuwata ([kuwata@ntu.edu.sg](mailto:kuwata@ntu.edu.sg))

The copyright of individual parts of the supplement might differ from the CC BY 4.0 License.

A. Comparison of total fine aerosol mass measurements

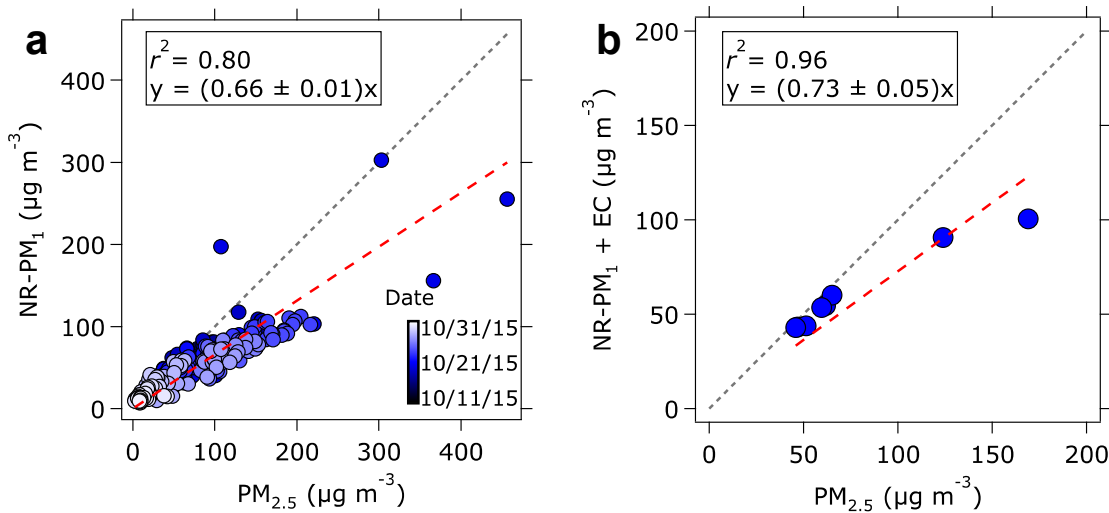

Figure S1: Linear regression plot of (a) NR- $PM_1$  mass concentration measured by ToF-ACSM and (b) estimated  $PM_1$  mass concentration (as a sum of NR- $PM_1$  and EC quantified from integrated samples) versus  $PM_{2.5}$  mass concentration as reported on the website of the National Environment Agency (NEA) of Singapore. The contribution of EC to  $PM_1$  is estimated to be around 9% during the entire campaign.

## B. ME-2 Analysis

The unconstrained model yielded a four-factor solution as shown in Fig. S2. Correlations of these four factors with the reference mass spectra (e.g., Ng et al., 2011), suggest that Factor 1 and 2 are hydrocarbon-like organic aerosol (HOA) and biomass burning organic aerosol (BBOA), respectively. The mass spectra of Factor 3 and 4, which both have good correlations with the reference low-volatility oxygenated organic aerosol (LV-OOA) factor (e.g., Ng et al., 2011), seem very similar to each other ( $R^2 \sim 0.9$ ; Table S1). The similarities between Factor 3 and 4 indicate mixed factors. To further identify the factor solution, we constrained HOA and BBOA mass spectra in the ME-2 analysis. In addition, we constrained the peat burning aerosol profile using mass spectrum from ToF-ACSM measurements of laboratory peat burning experiment (Budisulistiorini et al., 2017). We did not constrain OOA components and left it as the additional unconstrained factors (Crippa et al., 2014). The solutions were constrained with  $\alpha$ -value between 0 and 0.3 (delta 0.05) and estimated for one to eight numbers of factors. The solutions were evaluated by comparing the variations of factor contribution to OA and the  $Q/Q_{exp}$  as functions of a number of factors per  $\alpha$ -value. As illustrated in Fig. S3, the  $Q/Q_{exp}$  decreases with the number of factor solution, especially between one to four-factor solutions. Model solutions with more than four factors have less variation in the  $Q/Q_{exp}$  suggesting insignificant improvement in model solution. Hence, we selected the four-factor solution as the optimum solution. Within the four-factor solution,  $\alpha$ -value was selected to be the optimum variation based on factors correlation with external tracers as shown in Fig. S4 and Tables S2-S4.

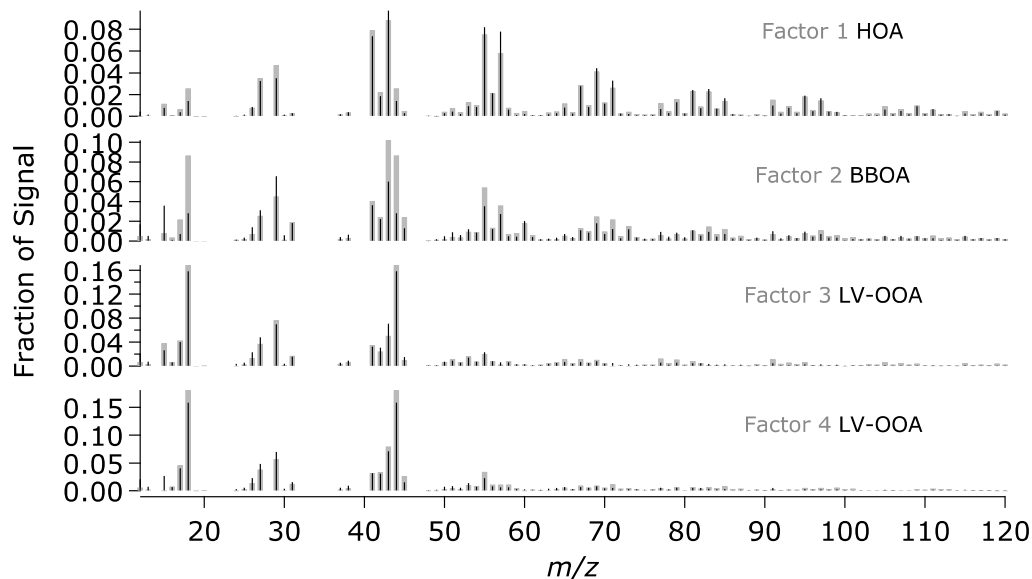

Figure S2: Mass spectra of factor solution from the unconstrained model. Black bars are the reference mass spectra from AMS measurements at urban sites (Ng et al., 2011).

**Table S1: Internal correlations of mass spectra ( $R_{MS}^2$ ) and time series ( $R_{TS}^2$ ) of factor solution from the unconstrained model.**

| $R_{MS}^2$ | Factor 1 | Factor 2 | Factor 3 | Factor 4 |
|------------|----------|----------|----------|----------|
| Factor 1   | 1.00     | 0.59     | 0.16     | 0.20     |
| Factor 2   |          | 1.00     | 0.65     | 0.76     |
| Factor 3   |          |          | 1.00     | 0.94     |
| Factor 4   |          |          |          | 1.00     |
| $R_{TS}^2$ | Factor 1 | Factor 2 | Factor 3 | Factor 4 |
| Factor 1   | 1.00     | 0.54     | 0.23     | 0.00     |
| Factor 2   |          | 1.00     | 0.78     | 0.18     |
| Factor 3   |          |          | 1.00     | 0.22     |
| Factor 4   |          |          |          | 1.00     |

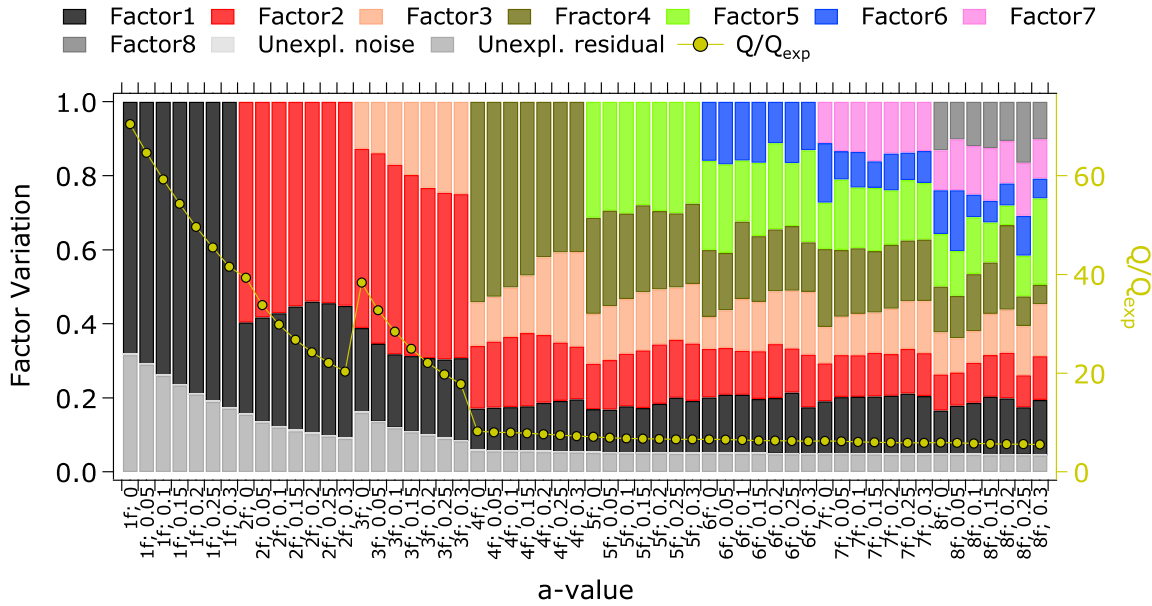

**5 Figure S3: Variation of factor time series contribution (left axis) and  $Q/Q_{exp}$  parameter values across different model solutions (right axis) are plotted as functions of the number of factors and constraint parameter ( $a$ -value). Example of x-axis label, 4f;0.05 means four number of factors (4-factor solution) with  $a$ -value of 0.05 (5% deviation from reference).**

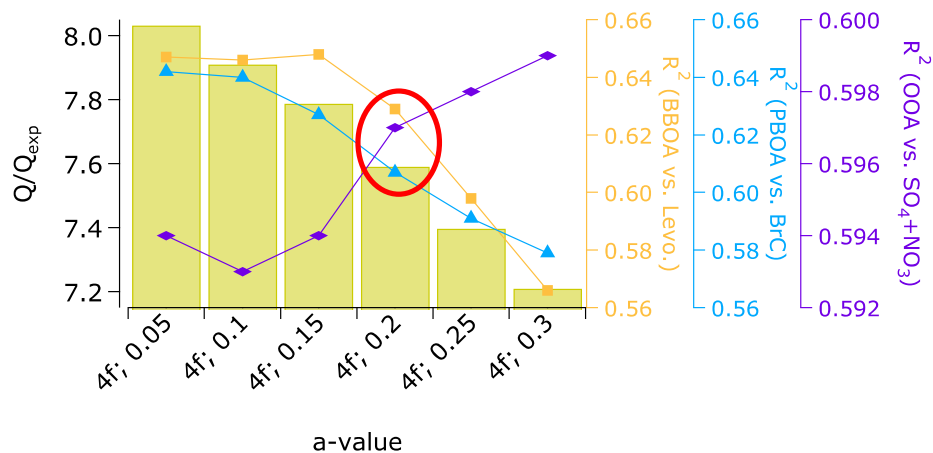

Figure S4:  $Q/Q_{exp}$  (left axis) as a function of the best solution (4-factor solution) for each  $a$ -value. The coefficient of determination ( $R^2$ ) of BBOA versus Levoglucosan, PBOA versus the sum of brown carbon (BrC) tracers, and OOA and sum of  $SO_4$  and  $NO_3$  are plotted in the right axis.

5

Table S2: Internal correlation of mass spectra ( $R_{MS}^2$ ) and time series ( $R_{TS}^2$ ) of factor solution from the constrained model.

| $R_{MS}^2$ | HOA  | BBOA | PBOA | OOA  |
|------------|------|------|------|------|
| HOA        | 1.00 | 0.54 | 0.86 | 0.13 |
| BBOA       |      | 1.00 | 0.45 | 0.35 |
| PBOA       |      |      | 1.00 | 0.08 |
| OOA        |      |      |      | 1.00 |
| $R_{TS}^2$ | HOA  | BBOA | PBOA | OOA  |
| HOA        | 1.00 | 0.12 | 0.48 | 0.18 |
| BBOA       |      | 1.00 | 0.63 | 0.81 |
| PBOA       |      |      | 1.00 | 0.79 |
| OOA        |      |      |      | 1.00 |

Table S3: Correlation between mass spectra of factor solutions of this study and references from previous studies.

| $R_{MS}^2$ | HOA  | BBOA | PBOA | OOA  | Ref. |
|------------|------|------|------|------|------|
| HOA        | 0.97 | 0.46 | 0.91 | 0.11 | a    |
| LV-OOA     | 0.14 | 0.45 | 0.07 | 0.96 | a    |
| SV-OOA     | 0.60 | 0.80 | 0.55 | 0.46 | a    |
| BBOA       | 0.62 | 0.96 | 0.56 | 0.31 | a    |

| $R_{MS}^2$          | HOA  | BBOA | PBOA | OOA  | Ref. |
|---------------------|------|------|------|------|------|
| 91Fac (Borneo)      | 0.81 | 0.75 | 0.65 | 0.52 | b    |
| Lab ISOPOOH SOA     | 0.75 | 0.85 | 0.67 | 0.15 | c    |
| IEPOX-OA (ATL 2012) | 0.21 | 0.60 | 0.15 | 0.87 | d    |
| IEPOX-OA (ATL 2011) | 0.29 | 0.69 | 0.22 | 0.67 | e    |
| IEPOX-OA (LRK 2013) | 0.15 | 0.53 | 0.07 | 0.91 | f    |
| COA                 | 0.86 | 0.57 | 0.68 | 0.11 | g    |
| PBOA                | 0.88 | 0.50 | 0.97 | 0.08 | h    |
| Lab IEPOX SOA       | 0.34 | 0.77 | 0.21 | 0.32 | e    |

References: (a) Ng et al. (2011), (b) Robinson et al. (2011), (c) Riva et al. (2016), (d) Budisulistiorini et al. (2016), (e) Budisulistiorini et al. (2013), (f) Budisulistiorini et al. (2015), (g) Crippa et al. (2013), (h) Budisulistiorini et al. (2017).

5 Table S4: Correlation between time trends of factor solution and chemical species quantified from offline (integrated samples) and online (real-time) measurements.

| $R_{TS}^2$                    | HOA  | BBOA | PBOA | OOA  | Ref. |
|-------------------------------|------|------|------|------|------|
| <i>Offline measurements</i>   |      |      |      |      |      |
| Levogluconan                  | 0.24 | 0.63 | 0.69 | 0.63 | a    |
| Brown carbon                  | 0.53 | 0.38 | 0.61 | 0.49 | b    |
| Isoprene SOA                  | 0.02 | 0.00 | 0.00 | 0.00 | c    |
| Organosulfates                | 0.10 | 0.05 | 0.03 | 0.02 | d, e |
| EC                            | 0.00 | 0.07 | 0.04 | 0.08 |      |
| Inorganic cations             |      |      |      |      | f    |
| K <sup>+</sup>                | 0.30 | 0.13 | 0.27 | 0.33 |      |
| Na <sup>+</sup>               | 0.31 | 0.01 | 0.11 | 0.11 |      |
| Mg <sup>2+</sup>              | 0.41 | 0.24 | 0.46 | 0.45 |      |
| Ca <sup>2+</sup>              | 0.29 | 0.54 | 0.64 | 0.69 |      |
| <i>Online measurements</i>    |      |      |      |      |      |
| NH <sub>4</sub> <sup>+</sup>  | 0.16 | 0.42 | 0.53 | 0.63 |      |
| SO <sub>4</sub> <sup>2-</sup> | 0.05 | 0.31 | 0.34 | 0.46 |      |
| NO <sub>3</sub> <sup>-</sup>  | 0.33 | 0.21 | 0.35 | 0.32 |      |

| $R_{TS}^2$                         | HOA  | BBOA | PBOA | OOA  | Ref. |
|------------------------------------|------|------|------|------|------|
| $\text{SO}_4^{2-} + \text{NO}_3^-$ | 0.17 | 0.40 | 0.49 | 0.60 |      |
| <i>Gaseous measurements</i>        |      |      |      |      |      |
| CO                                 | 0.16 | 0.23 | 0.38 | 0.42 |      |
| NO <sub>2</sub>                    | 0.02 | 0.00 | 0.00 | 0.00 |      |
| O <sub>3</sub>                     | 0.04 | 0.05 | 0.02 | 0.08 |      |

*References: (a) Simoneit et al. (1999), (b) Budisulistiorini et al. (2017), (c) Surratt et al. (2007), (d) Ma et al. (2014), (e) Riva et al. (2016), (f) Cheng et al. (2013).*

## C. Filter Analysis

**Table S5: Standards used for quantification of OA tracers by UPLC/DAD-ESI-HR-QTOFMS**

| Compound                                | Formula                                                     | Remarks               |
|-----------------------------------------|-------------------------------------------------------------|-----------------------|
| <i>Organosulfates</i>                   |                                                             |                       |
| Sodium propyl sulfate                   | C <sub>3</sub> H <sub>7</sub> O <sub>4</sub> SNa            | commercial            |
| Sodium octyl sulfate                    | C <sub>8</sub> H <sub>17</sub> O <sub>4</sub> SNa           | commercial            |
| <i>Authentic organosulfates</i>         |                                                             |                       |
| 2-methyltetrol sulfate                  | C <sub>5</sub> H <sub>12</sub> O <sub>7</sub> S             | synthesized at UNC CH |
| <i>Nitroaromatics</i>                   |                                                             |                       |
| 2-Nitrophenol                           | C <sub>6</sub> H <sub>5</sub> NO <sub>3</sub>               | commercial            |
| 4-Nitrophenol                           | C <sub>6</sub> H <sub>5</sub> NO <sub>3</sub>               | commercial            |
| 4-Nitrocatechol                         | C <sub>6</sub> H <sub>5</sub> NO <sub>4</sub>               | commercial            |
| 4-Nitro-o-cresol                        | C <sub>7</sub> H <sub>7</sub> NO <sub>3</sub>               | commercial            |
| 2-hydroxy-5-nitrobenzyl alcohol (HNBAL) | C <sub>7</sub> H <sub>7</sub> NO <sub>4</sub>               | commercial            |
| 2-Methyl-4-Nitroresorcinol (MNRC)       | C <sub>7</sub> H <sub>7</sub> NO <sub>4</sub>               | commercial            |
| 2-Hydroxy-5-nitrobenzoic acid (HNBAC)   | C <sub>7</sub> H <sub>5</sub> NO <sub>5</sub>               | commercial            |
| 2-methyl-4,6-dinitrophenol (MDNP)       | C <sub>7</sub> H <sub>6</sub> N <sub>2</sub> O <sub>5</sub> | commercial            |
| 2,6-Dimethyl-4-nitrophenol (DMNP)       | C <sub>8</sub> H <sub>9</sub> NO <sub>3</sub>               | commercial            |
| 4-Nitro-1-naphthol (NNAP)               | C <sub>10</sub> H <sub>7</sub> NO <sub>3</sub>              | commercial            |

**Table S6: Standards used in quantification of OA tracers by GC/EI-MS**

| Compound              | Formula                                       | Remarks               |
|-----------------------|-----------------------------------------------|-----------------------|
| <i>Anhydro sugars</i> |                                               |                       |
| Levogluconan          | C <sub>6</sub> H <sub>10</sub> O <sub>5</sub> | commercial            |
| Mannosan              | C <sub>6</sub> H <sub>10</sub> O <sub>5</sub> | commercial            |
| <i>Authentic SOA</i>  |                                               |                       |
| 2-methyltetrols       | C <sub>5</sub> H <sub>11</sub> O <sub>4</sub> | synthesized at UNC CH |
| <i>Organic Acids</i>  |                                               |                       |
| Malic acid            | C <sub>4</sub> H <sub>6</sub> O <sub>5</sub>  | commercial            |
| Pimelic acid          | C <sub>7</sub> H <sub>12</sub> O <sub>4</sub> | commercial            |
| Phthalic acid         | C <sub>8</sub> H <sub>6</sub> O <sub>4</sub>  | commercial            |
| Succinic acid         | C <sub>4</sub> H <sub>6</sub> O <sub>4</sub>  | commercial            |



| Compound      | Formula              | Remarks    |
|---------------|----------------------|------------|
| Maleic acid   | $C_4H_4O_4$          | commercial |
| Adipic acid   | $C_6H_{10}O_4$       | commercial |
| Glutaric acid | $C_5H_8O_4$          | commercial |
| <i>Other</i>  |                      |            |
| Sucrose       | $C_{12}H_{22}O_{11}$ | commercial |

D. Air Masses Backtrajectory

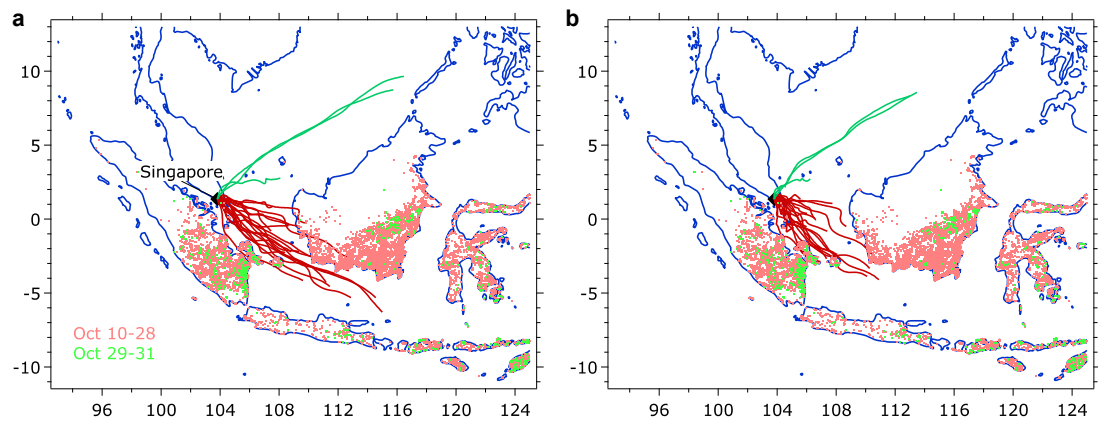

Figure S5: Air masses back-trajectory (NOAA Hysplit) at (a) 500 m and (b) 200 m above ground level (a.g.l.) at a duration of 72 hour in Singapore between October 10 and 31, 2015. Fire hotspots in Indonesia as observed by NASA Terra/Aqua MODIS are plotted as dot markers colored in light-red for October 10-28 period and light-green for October 29-31 period. During October 10 to 28, the air masses mainly came from south and southeast (Sumatra and Kalimantan). This period was assigned as Period 1 (red lines). During October 29 to 31, the air masses mainly came from north and northwest (Malaysia and the South China Sea). This period was assigned as Period 2 (green lines).

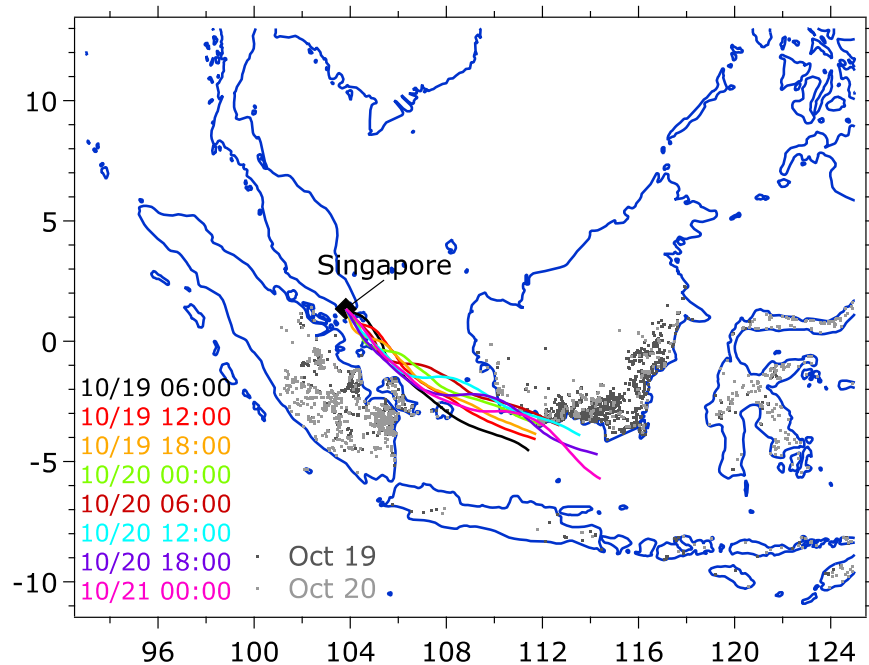

**Figure S6: Air masses at 500 m a.g.l. in Singapore were estimated for four time periods of a day, i.e., 06:00, 12:00, 18:00, and 00:00 Local Time. Fire hotspots in Indonesia as observed by NASA Terra/Aqua MODIS are plotted as dot markers colored in light-red for October 10-28 period and light-green for October 29-31 period.**

E. Elemental Analysis

Table S7: Descriptions of peat and vegetation analyzed by the Elemental Analyzer. Most of these samples were previously used in burning experiments which results have been reported by Budisulistiorini et al. (2017).

| No. | Type | Name     | Location                                          | Description                                               |
|-----|------|----------|---------------------------------------------------|-----------------------------------------------------------|
| 1   | Peat | Riau 1.1 | Riau Province                                     | Drained and burned peat                                   |
| 2   | Peat | Riau 1.2 | Riau Province                                     | Drained and burned peat                                   |
| 3   | Fern | Fern 1.1 | Riau Province                                     | Species: <i>Pteridium</i> . Dried fern.                   |
| 4   | Fern | Fern 1.2 | Riau Province                                     | Species: <i>Stenochlaena palustris</i> .<br>Dried fern.   |
| 5   | Leaf | Leaf     | Riau Province                                     | Species: <i>Acacia mangium</i> (acacia tree). Dried leaf. |
| 6   | Peat | CK 1.1   | Central Kalimantan Province,<br>Palangkaraya City | Drained and burned peat                                   |
| 7   | Peat | CK 1.2   | Central Kalimantan Province,<br>Palangkaraya City | Drained and unburned peat                                 |
| 8   | Peat | Riau 2   | Riau Province                                     | Unburned peat                                             |
| 9   | Peat | Riau 3.1 | Riau Province                                     | Unburned peat                                             |
| 10  | Peat | Riau 3.2 | Riau Province                                     | Unburned peat                                             |
| 11  | Peat | Riau 3.2 | Riau Province                                     | Unburned peat                                             |

Note: Samples were collected at ground surface (within 0 – 10 cm depth).

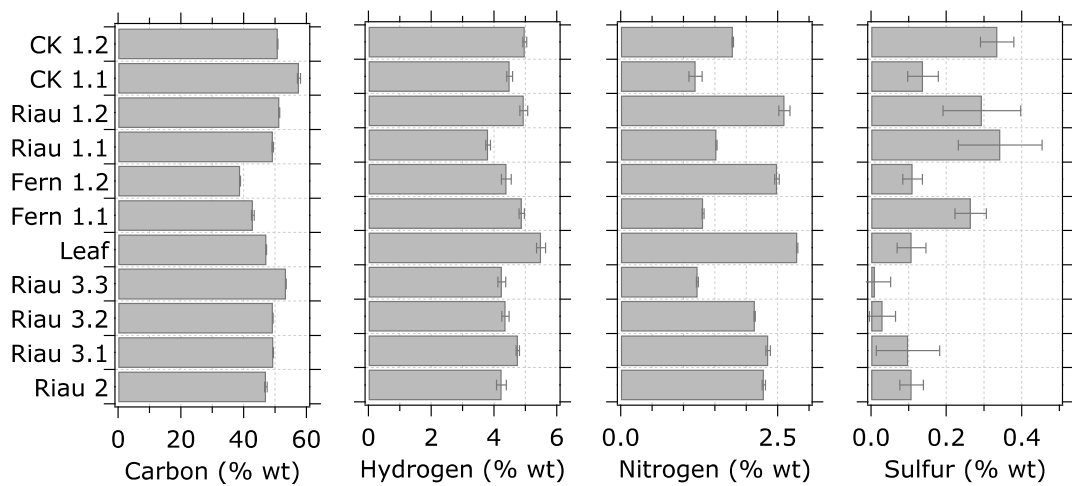

**Figure S7: Carbon, hydrogen, nitrogen, and sulfur contents in a percentage of the total sample weight.**

### F. Ambient Particle acidity

Ambient particle acidity was investigated by calculating neutralization degree of aerosol (Zhang et al., 2007). Neutralization degree of aerosol was calculated by the following equation:

$$\frac{NH_4^{+}_{meas}}{NH_4^{+}_{neu}} = \frac{[NH_4^{+}]}{2[SO_4^{2-}] + [NO_3^{-}] + [Cl^{-}]}$$

where  $NH_4^{+}_{meas}$  (nmol m<sup>-3</sup>) is the measured  $NH_4^{+}$  and  $NH_4^{+}_{neu}$  (nmol m<sup>-3</sup>) is the  $NH_4^{+}$  concentration required for full neutralization of the anions. Table S8 shows the estimated neutralization degree of aerosol during overall (October 10-31), P1 (October 10-28), and P2 (October 29-31) periods. Overall during the 2015 haze episode,  $NH_4^{+}$  were in excess for neutralization of the anions as indicated by  $NH_4^{+}_{meas}/NH_4^{+}_{neu}$  ratio equals to  $0.9 \pm 0.2$ .

Thermodynamic model ISORROPIA-II (Fountoukis and Nenes, 2007) was used to estimate aerosol liquid water content. Inputs for the model include aerosol-phase sulfate, nitrate, and ammonium in  $\mu\text{mol m}^{-3}$ , measured by the ACSM under ambient conditions, and RH and temperature obtained measured at NTU campus. It should be noted that the contribution of  $NH_3$  and organic water were not included in the calculation due to unavailability of gas-phase  $NH_3$  and organic aerosol water measurements.

**Table S8: Average, standard deviation (SD), minimum and maximum values of the ratio of measured ammonium concentration ( $NH_4^{+}_{meas}$ ) to the concentration of ammonium needed to fully neutralize the anions ( $NH_4^{+}_{neu}$ ).**

|         | Overall | P1  | P2  |
|---------|---------|-----|-----|
| mean    | 0.9     | 1.0 | 0.7 |
| 1 SD    | 0.2     | 0.1 | 0.3 |
| minimum | 0.0     | 0.0 | 0.0 |
| maximum | 1.9     | 1.7 | 1.9 |

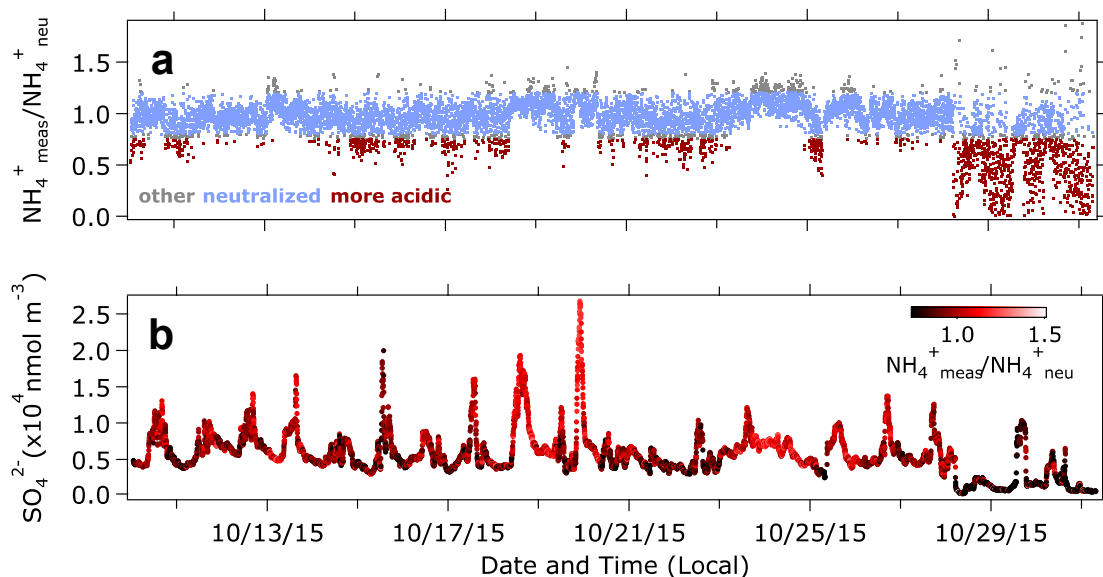

**Figure S8:** Time series of (a)  $\text{NH}_4^+_{\text{meas}}/\text{NH}_4^+_{\text{neu}}$  ratio and (b) sulfate concentration (bottom) in submicron particles.  $\text{NH}_4^+_{\text{meas}}/\text{NH}_4^+_{\text{neu}}$  ratio equals to  $1 \pm \text{SD}$  indicates that cations and anions are in a balance, whereas less than 0.75 indicates more acidic particles (Zhang et al., 2007).

5

**Table S9:** Average, standard deviation (SD), minimum and maximum values of aerosol liquid water content (LWC,  $\text{mol L}^{-1}$ ) estimated by ISORROPIA-II.

|         | Overall | P1   | P2   |
|---------|---------|------|------|
| mean    | 38.5    | 38.1 | 41.9 |
| 1 SD    | 5.8     | 5.6  | 5.6  |
| minimum | 20.7    | 20.7 | 26.3 |
| maximum | 53.2    | 53.2 | 50.9 |

G. Chemical Species Characterization

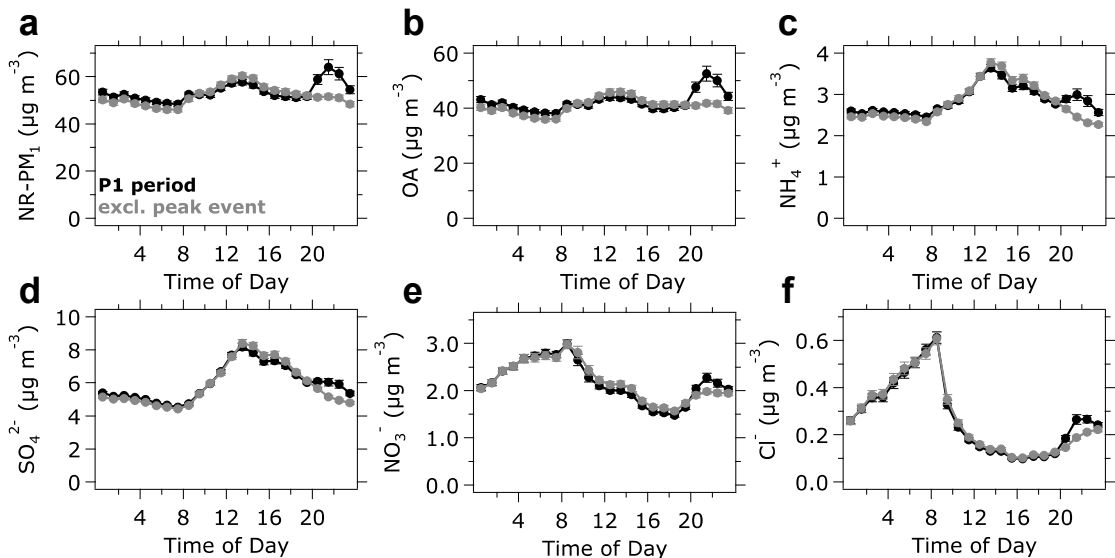

Figure S9: Diurnal variations of NR-PM<sub>1</sub>, OA, and inorganic compounds during the P1 period (black lines). Grey lines show the diurnal variations during the P1 period without the peak event on October 19-20. The peak event notably influenced the night peak (20:00-00:00) of all OA factors.

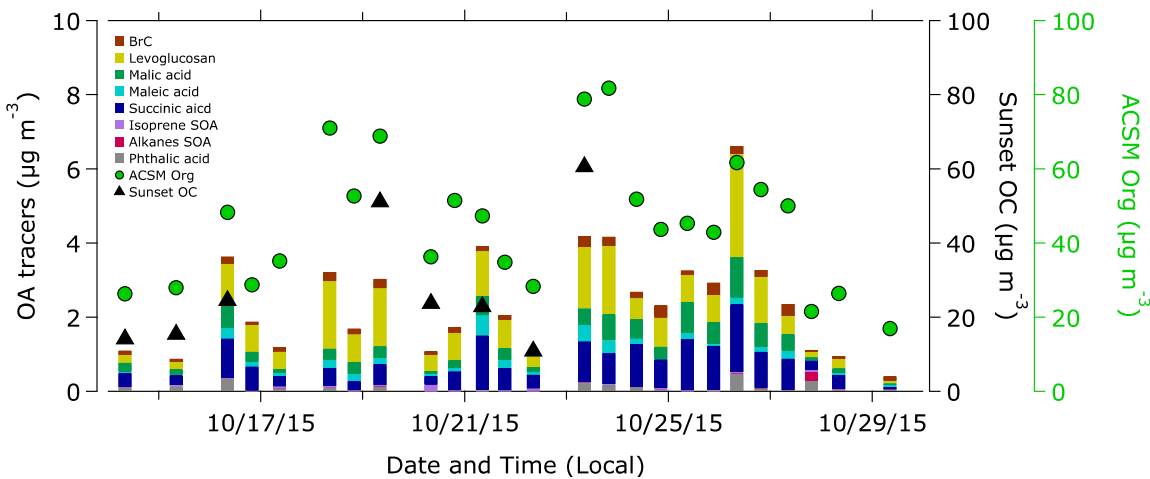

Figure S10: Sum of OA tracers quantified from integrated samples (left y-axis). Right axes show OC and OA measured by Sunset instrument and ToF-ACSM, respectively.



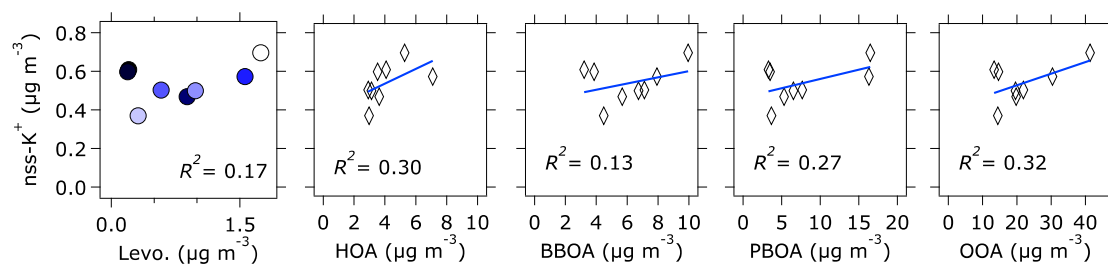

**Figure S11: Linear regressions of non-sea-salt  $K^+$  versus levoglucosan from integrated filter samples and OA factors from the ME-2 analysis.**

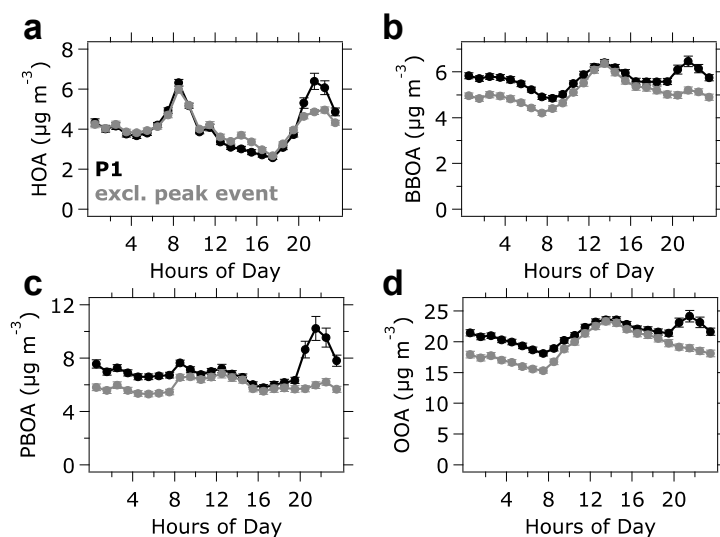

**5 Figure S12: Diurnal variations of the OA factors during the P1 period (black lines). Grey lines show the diurnal variations during the P1 period without the peak event on October 19-20. The peak event notably influenced the night peak (20:00-00:00) of all OA factors.**

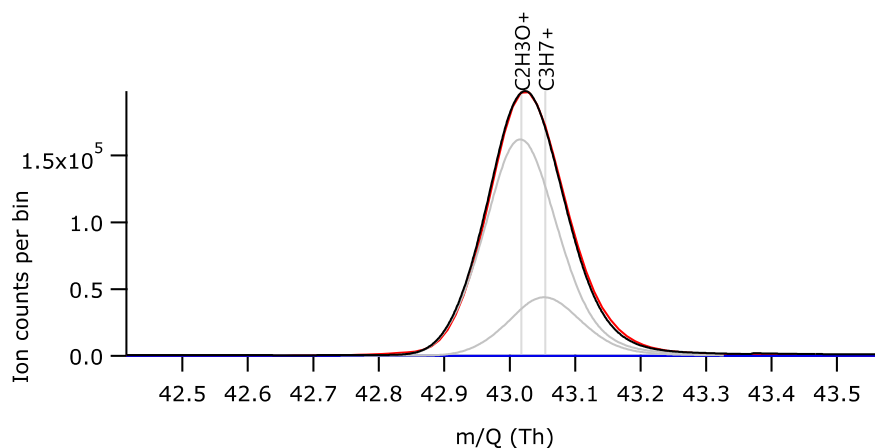

**Figure S13: Peak fitting of  $m/z$  43.**

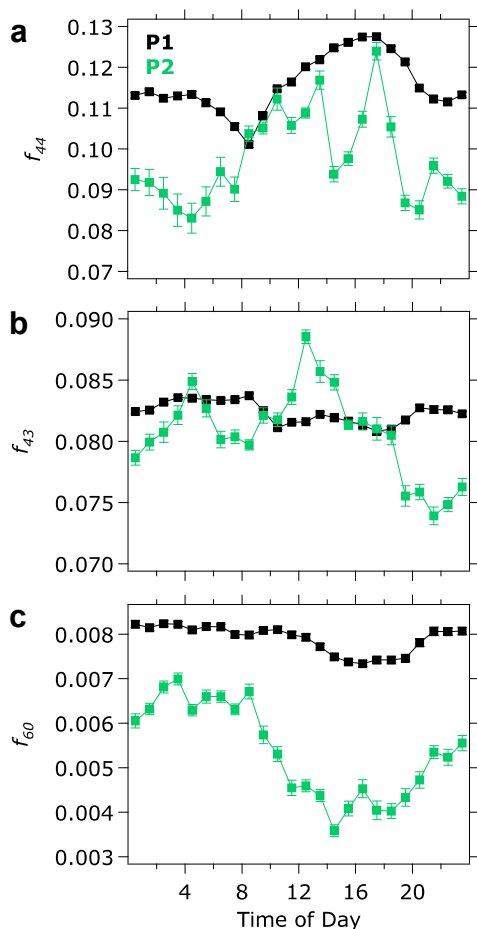

**Figure S14: Diurnal variations of (a)  $f_{44}$ , (b)  $f_{43}$ , and (c)  $f_{60}$  for P1 and P2 periods.**

## References

- Budisulistiorini, S. H., Canagaratna, M. R., Croteau, P. L., Marth, W. J., Baumann, K., Edgerton, E. S., Shaw, S. L.,
- Knipping, E. M., Worsnop, D. R., Jayne, J. T., Gold, A. and Surratt, J. D.: Real-time continuous characterization of
- secondary organic aerosol derived from isoprene epoxydiols in downtown Atlanta, Georgia, using the Aerodyne Aerosol
- Chemical Speciation Monitor, Environ. Sci. Technol., 47(11), 5686–5694, doi:10.1021/es400023n, 2013.
- Budisulistiorini, S. H., Li, X., Bairai, S. T., Renfro, J., Liu, Y., Liu, Y. J., McKinney, K. A., Martin, S. T., McNeill, V. F.,
- Pye, H. O. T., Nenes, A., Neff, M. E., Stone, E. A., Mueller, S., Knote, C., Shaw, S. L., Zhang, Z., Gold, A. and Surratt, J.
- D.: Examining the effects of anthropogenic emissions on isoprene-derived secondary organic aerosol formation during the
- 2013 Southern Oxidant and Aerosol Study (SOAS) at the Look Rock, Tennessee, ground site, Atmos. Chem. Phys., 15(15),
- 8871–8888, doi:10.5194/acp-15-8871-2015, 2015.
- Budisulistiorini, S. H., Baumann, K., Edgerton, E. S., Bairai, S. T., Mueller, S., Shaw, S. L., Knipping, E. M., Gold, A. and

- Surratt, J. D.: Seasonal characterization of submicron aerosol chemical composition and organic aerosol sources in the southeastern United States: Atlanta, Georgia, and Look Rock, Tennessee, *Atmos. Chem. Phys.*, 16(8), 5171–5189, doi:10.5194/acp-16-5171-2016, 2016.
- Budisulistiorini, S. H., Riva, M., Williams, M., Chen, J., Itoh, M., Surratt, J. D. and Kuwata, M.: Light-absorbing brown carbon aerosol constituents from combustion of Indonesian peat and biomass, *Environ. Sci. Technol.*, 51(8), 4415–4423, doi:10.1021/acs.est.7b00397, 2017.
- Cheng, Y., Engling, G., He, K.-B., Duan, F.-K., Ma, Y.-L., Du, Z.-Y., Liu, J.-M., Zheng, M. and Weber, R. J.: Biomass burning contribution to Beijing aerosol, *Atmos. Chem. Phys.*, 13(15), 7765–7781, doi:10.5194/acp-13-7765-2013, 2013.
- Crippa, M., DeCarlo, P. F., Slowik, J. G., Mohr, C., Heringa, M. F., Chirico, R., Poulain, L., Freutel, F., Sciare, J., Cozic, J., Di Marco, C. F., Elsasser, M., Nicolas, J. B., Marchand, N., Abidi, E., Wiedensohler, A., Drewnick, F., Schneider, J., Borrmann, S., Nemitz, E., Zimmermann, R., Jaffrezo, J.-L., Prévôt, A. S. H. and Baltensperger, U.: Wintertime aerosol chemical composition and source apportionment of the organic fraction in the metropolitan area of Paris, *Atmos. Chem. Phys.*, 13(2), 961–981, doi:10.5194/acp-13-961-2013, 2013.
- Crippa, M., Canonaco, F., Lanz, V. A., Äijälä, M., Allan, J. D., Carbone, S., Capes, G., Ceburnis, D., Dall’Osto, M., Day, D. A., DeCarlo, P. F., Ehn, M., Eriksson, A., Freney, E., Hildebrandt Ruiz, L., Hillamo, R., Jimenez, J. L., Junninen, H., Kiendler-Scharr, A., Kortelainen, A.-M., Kulmala, M., Laaksonen, A., Mensah, A. A., Mohr, C., Nemitz, E., O’Dowd, C., Ovadnevaite, J., Pandis, S. N., Petäjä, T., Poulain, L., Saarikoski, S., Sellegri, K., Swietlicki, E., Tiitta, P., Worsnop, D. R., Baltensperger, U. and Prévôt, A. S. H.: Organic aerosol components derived from 25 AMS data sets across Europe using a consistent ME-2 based source apportionment approach, *Atmos. Chem. Phys.*, 14(12), 6159–6176, doi:10.5194/acp-14-6159-2014, 2014.
- Fountoukis, C. and Nenes, A.: ISORROPIA II: a computationally efficient thermodynamic equilibrium model for  $K^+$ – $Ca^{2+}$ – $Mg^{2+}$ – $NH_4^+$ – $Na^+$ – $SO_4^{2-}$ – $NO_3^-$ – $Cl^-$ – $H_2O$  aerosols, *Atmos. Chem. Phys.*, 7(17), 4639–4659, doi:10.5194/acp-7-4639-2007, 2007.
- Ma, Y., Xu, X., Song, W., Geng, F. and Wang, L.: Seasonal and diurnal variations of particulate organosulfates in urban Shanghai, China, *Atmos. Environ.*, 85(Supplement C), 152–160, doi:https://doi.org/10.1016/j.atmosenv.2013.12.017, 2014.
- Ng, N. L., Canagaratna, M. R., Jimenez, J. L., Zhang, Q., Ulbrich, I. M. and Worsnop, D. R.: Real-time methods for estimating organic component mass concentrations from aerosol mass spectrometer data, *Environ. Sci. Technol.*, 45(3), 910–916, doi:10.1021/es102951k, 2011.
- Riva, M., Budisulistiorini, S. H., Chen, Y., Zhang, Z., D’Ambro, E. L., Zhang, X., Gold, A., Turpin, B. J., Thornton, J. A., Canagaratna, M. R. and Surratt, J. D.: Chemical characterization of secondary organic aerosol from oxidation of isoprene hydroxyhydroperoxides, *Environ. Sci. Technol.*, 50(18), 9889–9899, doi:10.1021/acs.est.6b02511, 2016.
- Robinson, N. H., Newton, H. M., Allan, J. D., Irwin, M., Hamilton, J. F., Flynn, M., Bower, K. N., Williams, P. I., Mills, G., Reeves, C. E., McFiggans, G. and Coe, H.: Source attribution of Bornean air masses by back trajectory analysis during the OP3 project, *Atmos. Chem. Phys.*, 11(5), 9605–9630, doi:10.5194/acp-11-9605-2011, 2011.

Simoneit, B. R. T., Schauer, J. J., Nolte, C. G., Oros, D. R., Elias, V. O., Fraser, M. P., Rogge, W. F. and Cass, G. R.: Levoglucosan, a tracer for cellulose in biomass burning and atmospheric particles, *Atmos. Environ.*, 33(2), 173–182, doi:10.1016/S1352-2310(98)00145-9, 1999.

Surratt, J. D., Kroll, J. H., Kleindienst, T. E., Edney, E. O., Claeys, M., Sorooshian, A., Ng, N. L., Offenberg, J. H.,  
5 Lewandowski, M., Jaoui, M., Flagan, R. C. and Seinfeld, J. H.: Evidence for organosulfates in secondary organic aerosol, *Environ. Sci. Technol.*, 41(2), 517–527, doi:10.1021/es062081q, 2007.

Zhang, Q., Jimenez, J. L., Worsnop, D. R. and Canagaratna, M.: A case study of urban particle acidity and its influence on secondary organic aerosol, *Environ. Sci. Technol.*, 41(9), 3213–3219, doi:10.1021/es061812j, 2007.
